# Supplementary material for: Increased tauopathy drives microglia-mediated clearance of beta-amyloid
Source: Springer Nature journal article supplement (doi:10.1186/s40478-016-0336-1), 2016-06-23

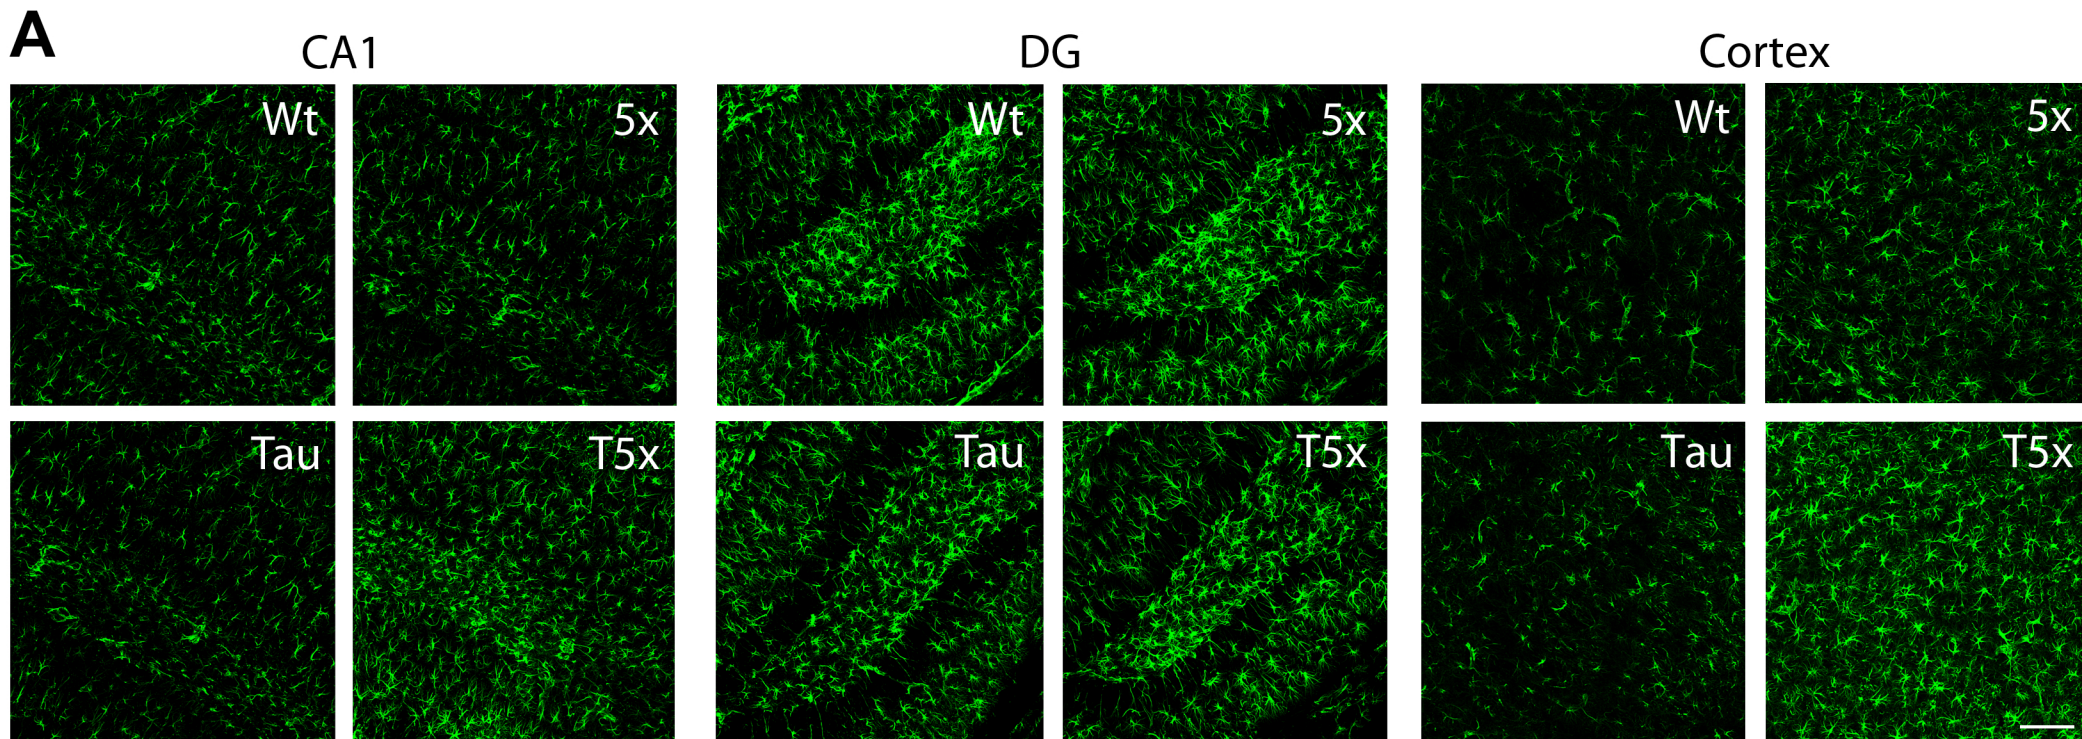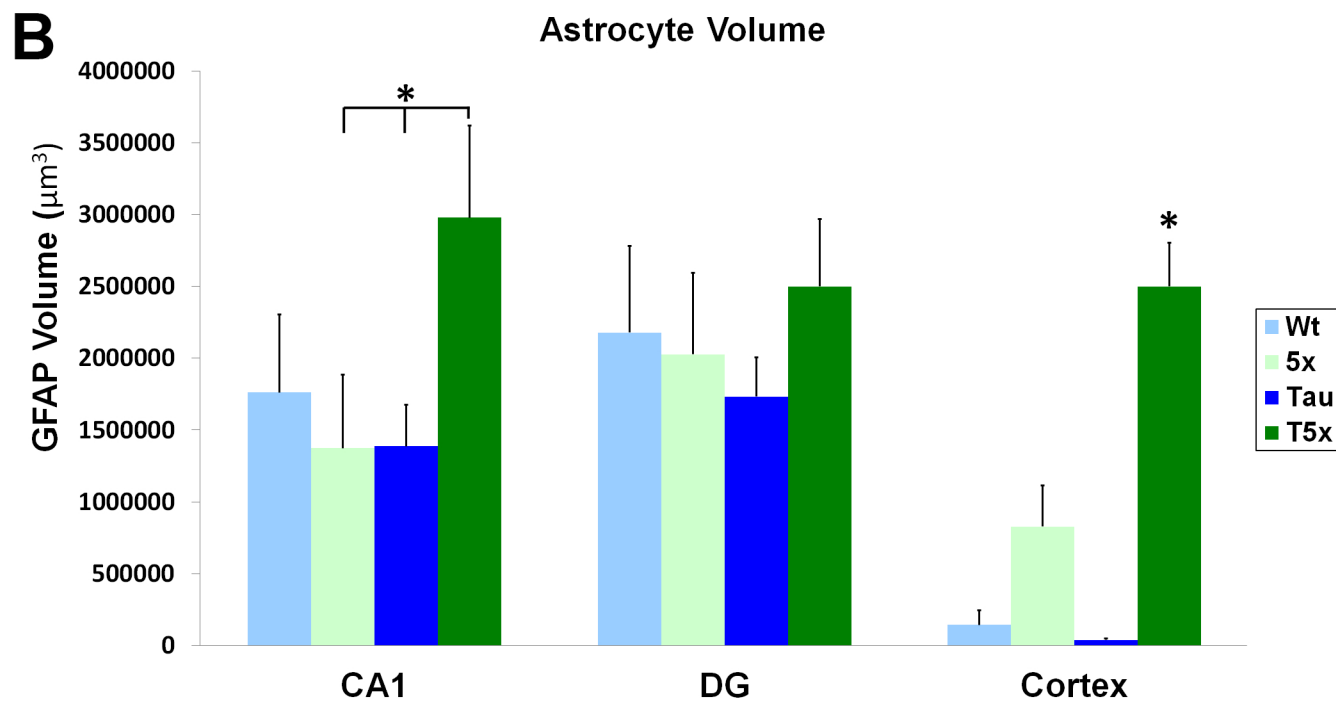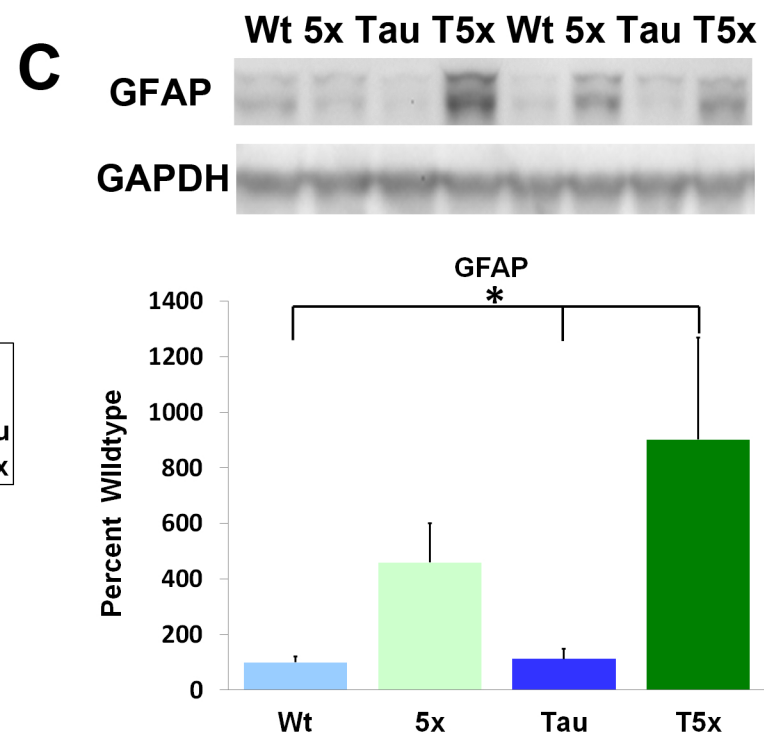

Supplement: MOESM4 [file 25665982]
